# Supplementary material for: Antimicrobial Activity against Paenibacillus larvae and Functional Properties of Lactiplantibacillus plantarum Strains: Potential Benefits for Honeybee Health
Source: MDPI journal article supplement (doi:10.3390/antibiotics9080442), 2020-07-24
Supplement: s1 [file s1]

|                | Contact<br>Time (min) | Hydrophobicity (%)       |                          |                          |                          |                          |
|----------------|-----------------------|--------------------------|--------------------------|--------------------------|--------------------------|--------------------------|
|                |                       | P8                       | P25                      | P86                      | P95                      | P100                     |
| <b>Xylene</b>  | 15                    | 96.5 ± 1.9 <sup>Ad</sup> | 94.6 ± 1.2 <sup>Ad</sup> | 57.1 ± 2.0 <sup>Ac</sup> | 44.9 ± 3.0 <sup>Ab</sup> | 30.0 ± 2.7 <sup>Aa</sup> |
|                | 30                    | 97.3 ± 2.1 <sup>Ad</sup> | 98.0 ± 1.1 <sup>Ad</sup> | 58.8 ± 3.1 <sup>Ac</sup> | 46.9 ± 3.0 <sup>Ab</sup> | 33.5 ± 1.4 <sup>Aa</sup> |
|                | 60                    | 99.4 ± 0.4 <sup>Ad</sup> | 99.1 ± 0.6 <sup>Ad</sup> | 59.3 ± 1.9 <sup>Ac</sup> | 47.4 ± 1.4 <sup>Ab</sup> | 36.1 ± 2.1 <sup>Aa</sup> |
| <b>Toluene</b> | 15                    | 95.7 ± 0.9 <sup>Ad</sup> | 95.6 ± 0.6 <sup>Ad</sup> | 31.5 ± 2.0 <sup>Ab</sup> | 47.2 ± 1.3 <sup>Ac</sup> | 19.5 ± 1.1 <sup>Aa</sup> |
|                | 30                    | 97.3 ± 1.3 <sup>Ad</sup> | 97.2 ± 1.4 <sup>Ad</sup> | 46.9 ± 1.6 <sup>Bb</sup> | 47.6 ± 2.1 <sup>Ac</sup> | 34.8 ± 1.8 <sup>Ba</sup> |
|                | 60                    | 99.6 ± 0.2 <sup>Ad</sup> | 98.7 ± 0.2 <sup>Ad</sup> | 59.1 ± 1.5 <sup>Cc</sup> | 47.8 ± 1.9 <sup>Ab</sup> | 38.2 ± 1.9 <sup>Ca</sup> |
