# Supplementary material for: Antimicrobial Activity against Paenibacillus larvae and Functional Properties of Lactiplantibacillus plantarum Strains: Potential Benefits for Honeybee Health
Source: MDPI journal article supplement (doi:10.3390/antibiotics9080442), 2020-07-24
Supplement: s1 [file s1]

| L. plantarum strains collection | Isolation Source | ZOI (mm) agar spot test | Selected strains |
|---------------------------------|------------------|-------------------------|------------------|
| P3                              | beebread         | < 4 mm                  |                  |
| P4                              | beebread         | no inhibition           |                  |
| P5                              | beebread         | < 4 mm                  |                  |
| P7                              | beebread         | < 4 mm                  |                  |
| P8                              | beebread         | > 4 mm                  | P8               |
| P9                              | beebread         | < 4 mm                  |                  |
| P21                             | beebread         | < 4 mm                  |                  |
| P36                             | beebread         | < 4 mm                  |                  |
| P37                             | beebread         | no inhibition           |                  |
| P39                             | beebread         | no inhibition           |                  |
| P57                             | beebread         | < 4 mm                  |                  |
| P61                             | beebread         | no inhibition           |                  |
| P81                             | beebread         | no inhibition           |                  |
| P82                             | beebread         | < 4 mm                  |                  |
| P86                             | beebread         | > 4 mm                  | P86              |
| P87                             | beebread         | < 4 mm                  |                  |
| P88                             | beebread         | < 4 mm                  |                  |
| P92                             | beebread         | < 4 mm                  |                  |
| P94                             | beebread         | < 4 mm                  |                  |
| P95                             | beebread         | < 4 mm                  |                  |
| P97                             | beebread         | < 4 mm                  |                  |
| P101                            | beebread         | no inhibition           |                  |
| P103                            | beebread         | no inhibition           |                  |
| P106                            | beebread         | no inhibition           |                  |
| P108                            | beebread         | no inhibition           |                  |
| P1                              | honey stomach    | no inhibition           |                  |
| P3                              | honey stomach    | no inhibition           |                  |
| P10                             | honey stomach    | < 4 mm                  |                  |
| P15                             | honey stomach    | no inhibition           |                  |
| P21                             | honey stomach    | no inhibition           |                  |
| P24                             | honey stomach    | no inhibition           |                  |
| P26                             | honey stomach    | no inhibition           |                  |
| P27                             | honey stomach    | no inhibition           |                  |
| P35                             | honey stomach    | no inhibition           |                  |
| P38                             | honey stomach    | no inhibition           |                  |
| P40                             | honey stomach    | no inhibition           |                  |
| P59                             | honey stomach    | no inhibition           |                  |

|      |               |               |      |
|------|---------------|---------------|------|
| P60  | honey stomach | no inhibition |      |
| P69  | honey stomach | no inhibition |      |
| P70  | honey stomach | no inhibition |      |
| P73  | honey stomach | no inhibition |      |
| P74  | honey stomach | no inhibition |      |
| P80  | honey stomach | < 4 mm        |      |
| P81  | honey stomach | no inhibition |      |
| P82  | honey stomach | < 4 mm        |      |
| P83  | honey stomach | no inhibition |      |
| P92  | honey stomach | no inhibition |      |
| P94  | honey stomach | no inhibition |      |
| P95  | honey stomach | > 4 mm        | P95  |
| P97  | honey stomach | no inhibition |      |
| P100 | honey stomach | > 4 mm        | P100 |
| P103 | honey stomach | no inhibition |      |
| P104 | honey stomach | no inhibition |      |
| P106 | honey stomach | no inhibition |      |
| P108 | honey stomach | no inhibition |      |
| P111 | honey stomach | no inhibition |      |
| P10  | mid-gut       | < 4 mm        |      |
| P25  | mid-gut       | > 4 mm        | P25  |
| P48  | mid-gut       | < 4 mm        |      |
| P54  | mid-gut       | < 4 mm        |      |
| P55  | mid-gut       | < 4 mm        |      |
