# Supplementary material for: Antimicrobial Activity against Paenibacillus larvae and Functional Properties of Lactiplantibacillus plantarum Strains: Potential Benefits for Honeybee Health
Source: MDPI journal article supplement (doi:10.3390/antibiotics9080442), 2020-07-24
Supplement: s1 [file s1]

| Time<br>(hours) | Auto-Aggregation (%)     |                          |                          |                          |                          |
|-----------------|--------------------------|--------------------------|--------------------------|--------------------------|--------------------------|
|                 | P8                       | P25                      | P86                      | P95                      | P100                     |
| 1               | 10.9 ± 0.8 <sup>Aa</sup> | 16.0 ± 1.1 <sup>Ab</sup> | 10.7 ± 0.8 <sup>Aa</sup> | 16.0 ± 0.3 <sup>Ab</sup> | 12.3 ± 0.7 <sup>Aa</sup> |
| 2               | 14.2 ± 0.7 <sup>Ba</sup> | 20.0 ± 1.6 <sup>Ba</sup> | 15.2 ± 0.8 <sup>Ba</sup> | 19.5 ± 1.2 <sup>Ba</sup> | 17.8 ± 1.1 <sup>Ba</sup> |
| 5               | 19.4 ± 0.5 <sup>Ca</sup> | 24.8 ± 0.8 <sup>Ca</sup> | 20.3 ± 1.9 <sup>Ca</sup> | 23.0 ± 0.9 <sup>Ca</sup> | 22.3 ± 0.6 <sup>Ca</sup> |
| 24              | 97.8 ± 1.0 <sup>Db</sup> | 99.5 ± 0.2 <sup>Cb</sup> | 78.6 ± 3.6 <sup>Da</sup> | 80.8 ± 0.9 <sup>Da</sup> | 79.2 ± 3.0 <sup>Da</sup> |
